# Supplementary material for: Plant tolerance to excess light energy and photooxidative damage relies on plastoquinone biosynthesis
Source: Springer Nature journal article supplement (doi:10.1038/srep10919), 2015-06-03
Supplement: 41598_2015_BFsrep10919_MOESM1_ESM.pdf [file 41598_2015_BFsrep10919_MOESM1_ESM.pdf]

**Plant tolerance to excess light energy and photooxidative damage  
relies on plastoquinone biosynthesis**

Brigitte Ksas, Noëlle Becuwe, Anne Chevalier & Michel Havaux

**Supplemental Table 1.** List of genes and oligonucleotide primer sequences used for the gene expression analysis by qRT-PCR.

| Name   | Locus     | Forward primer seq.<br>(5'-3') | Reverse primer seq.<br>(5'-3') | Length<br>(pb) |
|--------|-----------|--------------------------------|--------------------------------|----------------|
| SPS1   | At1g78510 | GCAAGCTTGATACACGACGA           | TGGACGCCTGCTTTATCTCT           | 220            |
| SPS2   | At1g17050 | TGATTTGCAGAGGTTGAACG           | ATCTCACCTAAACGCCGATG           | 198            |
| HST    | At3g11950 | TGCTGCAATGGTGAAAGAAG           | CTTCTGGAGCTTTGGTTTCG           | 179            |
| HPPD   | At1g06570 | CGACTTCATGCCTTCTCCTC           | AAATATCGTCGGCCTGTCAC           | 181            |
| VTE1   | At4g32770 | ACTAGTTCCCCGCTCCATTT           | CTCGAAGAACTCCGAGGTG            | 169            |
| VTE3   | At3g63410 | CCAAAGCAAAGCAAAGGAG            | GCTTCCCTTATCCCCTCTG            | 151            |
| ACTIN2 | At3g18780 | CTCTCCCGCTATGTATGTCGC          | GAAACCCTCGTAGATTGGCA           | 124            |

Percentage reduction state of plastoquinone-9 in WT and *ch1* leaves

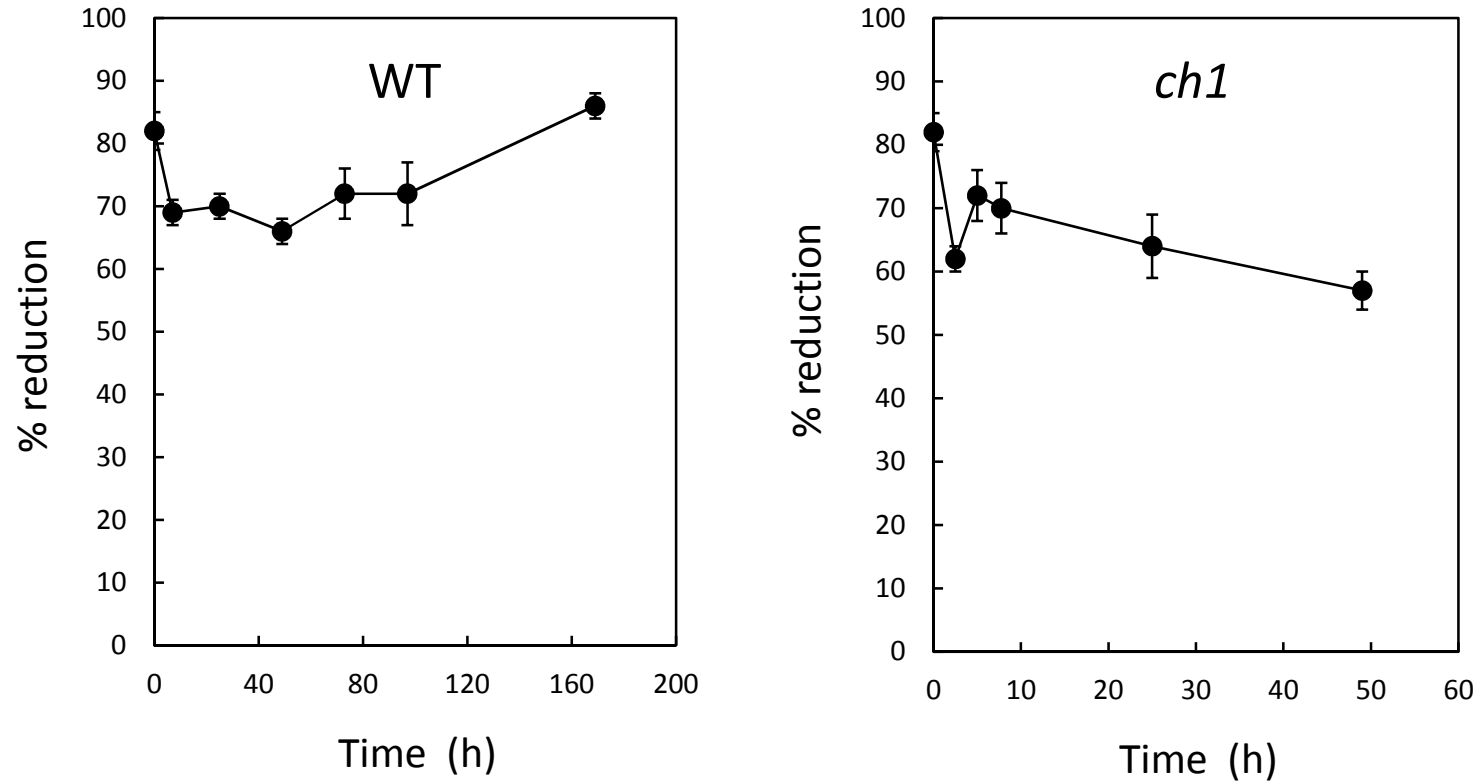

Supplementary Fig. 1: Percentage reduction state of plastoquinone-9 (ratio between reduced plastoquinone-9 and total plastoquinone x100) in WT and *ch1* Arabidopsis leaves during high light stress ( $1300 \mu\text{mol m}^{-2} \text{s}^{-1}$  at  $8^\circ\text{C}$ ).

## Percentage reduction state of plastoquinone-9 in WT and SPS1oex leaves

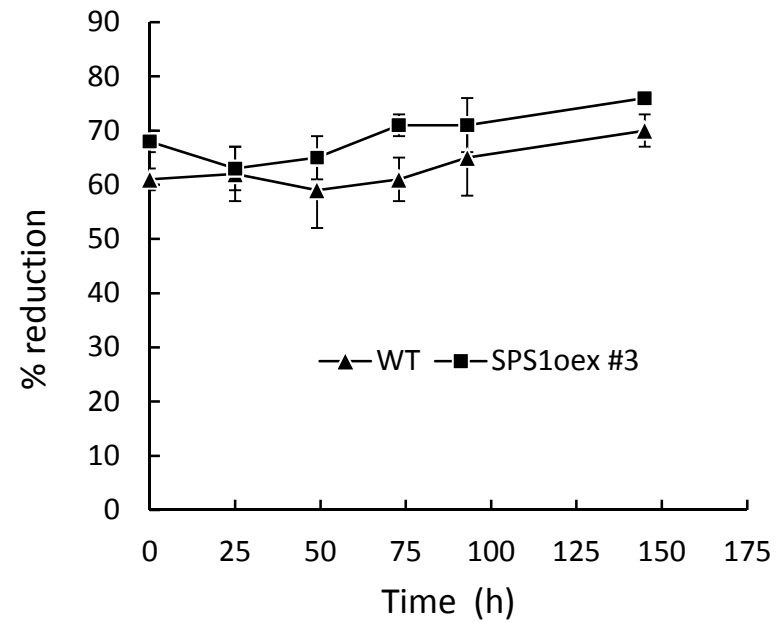

Supplementary Fig. 2: Percentage reduction state of plastoquinone-9 in WT and SPS1oex leaves during high light stress ( $1300 \mu\text{mol m}^{-2} \text{s}^{-1}$  at  $8^\circ\text{C}$ ).

## Growth and photosynthesis of WT and SPS1oex plants

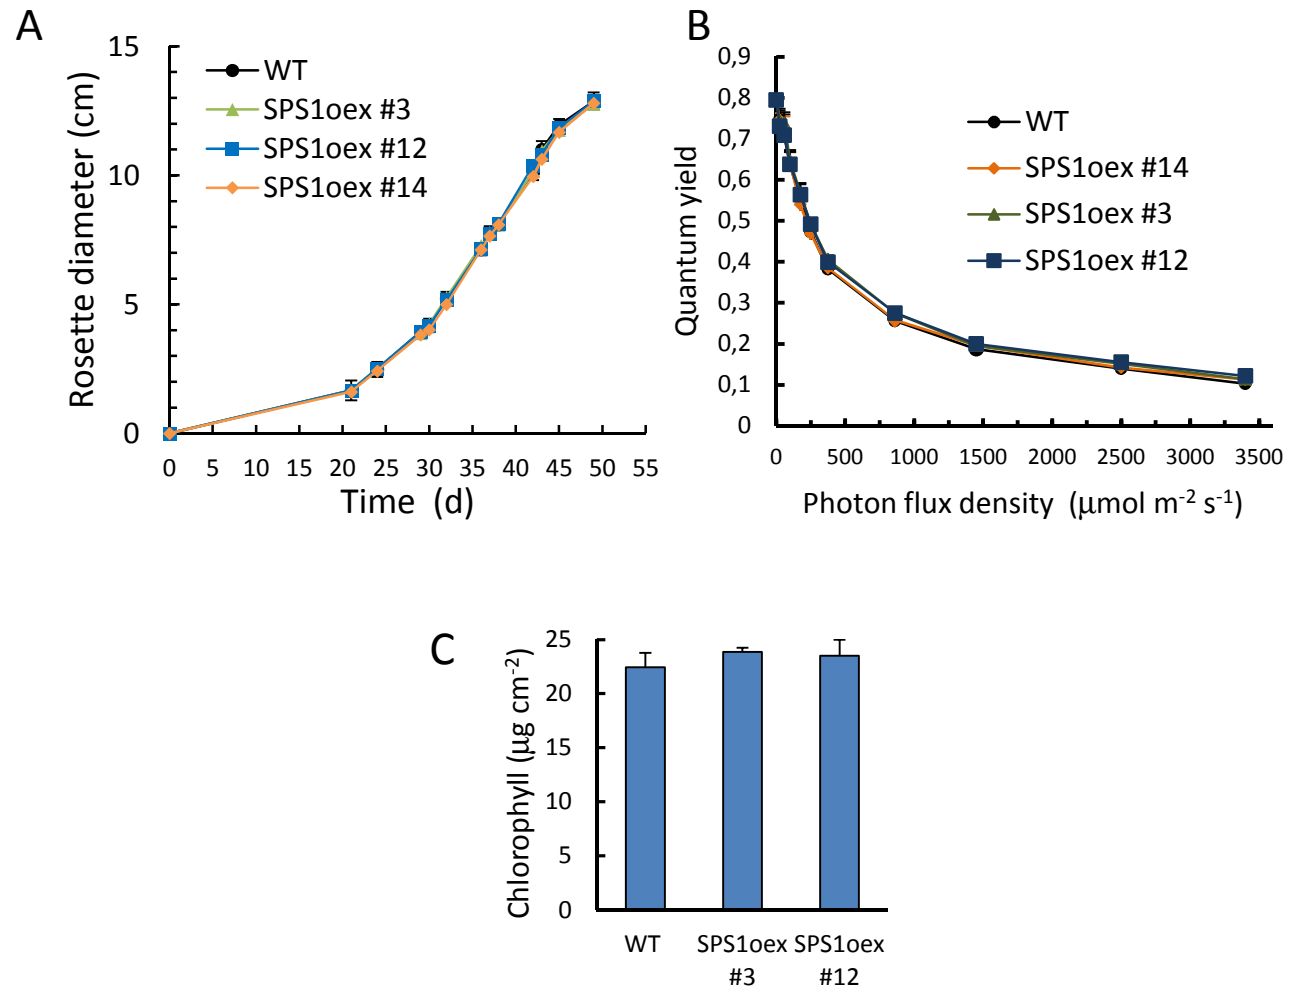

Supplementary Fig. 3: A) Growth curve of WT Arabidopsis and 3 SPS1oex lines. Data are mean value of 6 measurements  $\pm$  SD. B) Quantum yield of photosynthetic electron transport ( $\Delta F/F_m'$ ) at different PFDs. Data are mean values of 5 separate experiments + SD. C) Total chlorophyll. Data are mean values of 4 separate experiments + SD.
